# Supplementary material for: A flexible 1,8-naphthyridyl derivative and its Zn(II) complexes: synthesis, structures, spectroscopic properties and recognition of Cd(II)
Source: Royal Society of Chemistry journal article supplement (doi:10.1039/b809701a), 2008-01-01
Supplement: b809701a.pdf [file b809701a.pdf]

# **A Flexible 1,8-Naphthyridyl Derivative and Its Zn(II) Complexes: Synthesis, Structures, Spectroscopic Properties and Recognition of Cd(II)**

Hui-Miao Zhang, Wen-Fu Fu<sup>\*</sup>, Xin Gan, Yan-Qing Xu, Jun Wang, Quan-Qing Xu  
and Shao-Ming Chi

*Key Laboratory of Photochemical Conversion and Optoelectronic Materials, TIPC CAS,  
Technical Institute of Physics and Chemistry, Chinese Academy of Sciences, Beijing, 100190, P.R.  
China.*

*College of Chemistry and Chemical Engineering, Yunnan Normal University, Kunming, 650092,  
P.R. China.*

*The Institute for Chemical Physics, and Department of Chemistry, Beijing Institute of Technology,  
Beijing 100081, P.R. China.*

[wf\\_fu@yahoo.com.cn](mailto:wf_fu@yahoo.com.cn)

## **Table of Contents**

**Fig. S1** UV-Vis spectra changes of **1** in CH<sub>2</sub>Cl<sub>2</sub> upon addition of CH<sub>3</sub>OH.

**Fig. S2** UV-Vis spectra changes of **1** in CH<sub>2</sub>Cl<sub>2</sub> upon addition of CH<sub>3</sub>CN.

**Fig. S3** Crystal packing diagram of **1**.

**Fig. S4** Fitting analysis of L-Cd at different Cd(II) concentrations.

**Fig. S5** Fitting analysis of L-Zn (**1**) at different Zn(II) concentrations.

**Fig. S6** Comparison of IR spectra of L-Cd and L-Zn (**1**).

**Fig. S7** Fluorescence response of **L** (1.0×10<sup>-5</sup> M, CH<sub>3</sub>OH) to different ions (1.0×10<sup>-4</sup> M), λ<sub>ex</sub>=340 nm.

**Fig. S8** Fluorescence response of **L** (1.0×10<sup>-5</sup> M, CH<sub>3</sub>OH) to Cd(II) in the presence of competing metal ions (1.0×10<sup>-5</sup> M), λ<sub>ex</sub>=340 nm.

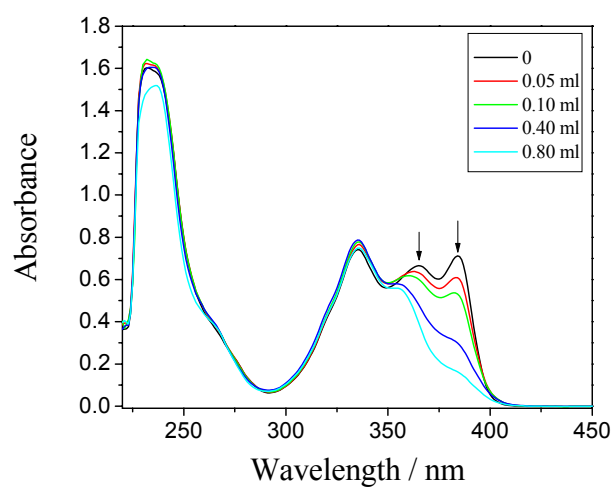

**Fig. S1** UV-Vis spectra changes of **1** in  $\text{CH}_2\text{Cl}_2$  upon addition of  $\text{CH}_3\text{OH}$ .

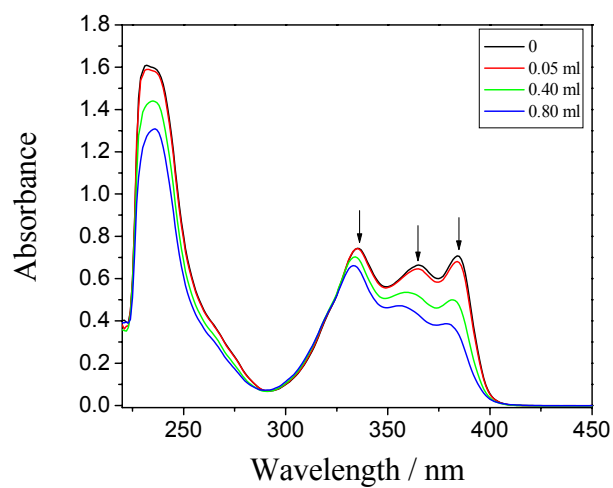

**Fig. S2** UV-vis spectra changes of **1** in  $\text{CH}_2\text{Cl}_2$  upon addition of  $\text{CH}_3\text{CN}$ .

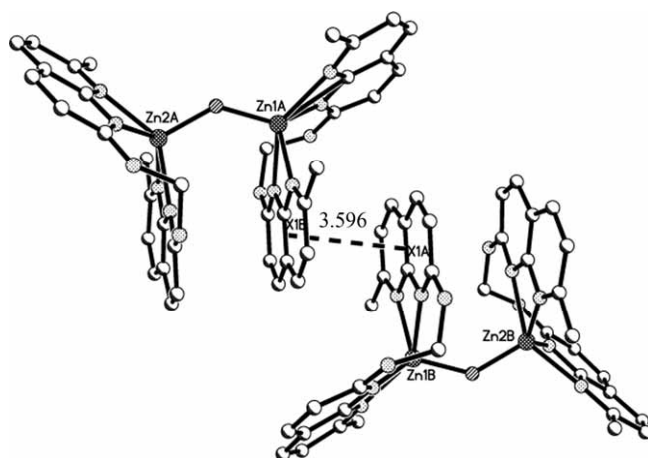

**Fig. S3** Crystal packing diagram of **1**.

## Calculation of the binding constant of L-Cd

$$\frac{I_0}{I-I_0} = \frac{I_0}{[L]} + \frac{I_0}{[L]*K_s} * \frac{1}{[Cd]} \quad (1)^i$$

$K_s$  = Binding constant

$I_0$  = The fluorescence intensity of **L**

$I$  = The observed fluorescence intensity of **L** in the presence of Cd(II)

Due to the fluorescence intensity of **L-Cd** at 402 nm was four times more than that of **L**,  $I-I_0$  can be approximate to  $I$ . Plot of  $1/I$  against  $1/[Cd]$  was shown in Fig. S4.

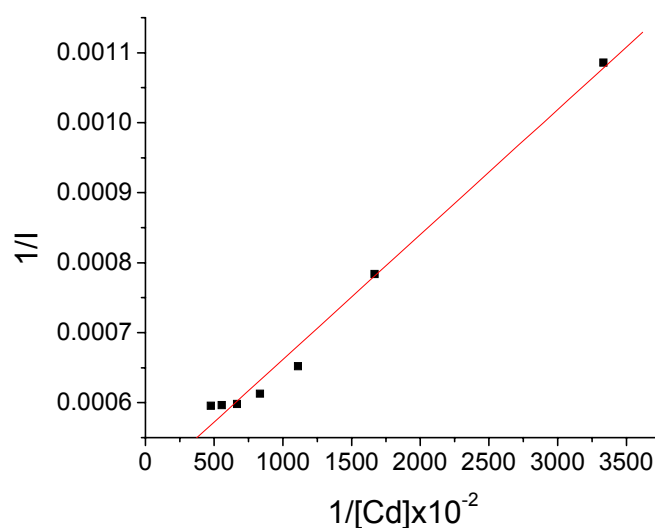

**Fig. S4** Fitting analysis of **L-Cd** at different Cd(II) concentrations.  
Emission was recorded at 402 nm.

Linear Regression for Data1\_B:

$$Y = A + B * X$$

| Parameter | Value      | Error       |
|-----------|------------|-------------|
| A         | 4.83087E-4 | 1.3307E-5   |
| B         | 1.7856E-9  | 8.59022E-11 |

R SD N P

0.99426 2.12622E-5 7 <0.0001

$$K_s = A/B = (4.83087/1.7856) \times 10^5 = 2.71 \times 10^5$$

$$\Delta K_s = |\Delta A/A - \Delta B/B| \times K_s = 5.60 \times 10^3$$

$$K = K_s + \Delta K_s = (2.71 \pm 0.056) \times 10^5$$

Calculation of the binding constant of L-Zn (1)

$$\frac{A_0}{A_0-A} = \frac{A_0}{[L]} + \frac{A_0}{[L]*K_s} * \frac{1}{[Zn]} \quad (2)^{ii}$$

$K_s$  = Binding constant;

$A_0$  = The observed absorbance at the absence of cation;

$A$  = The observed absorbance in the presence of cation.

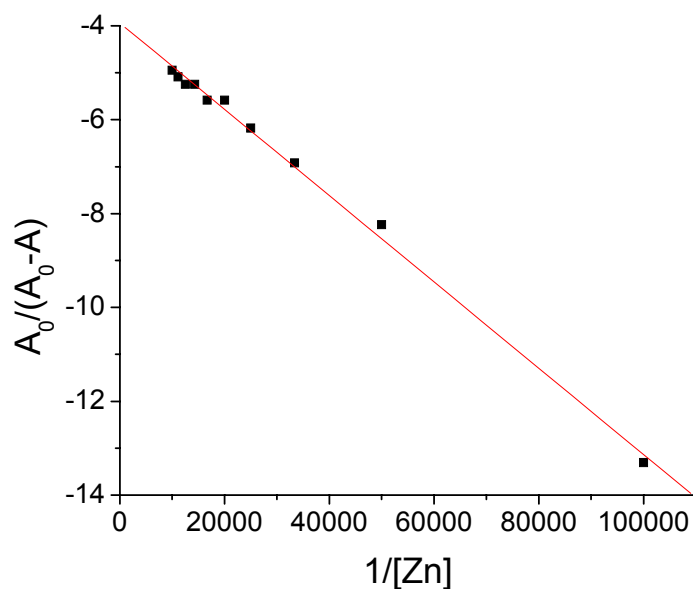

**Fig. S5** Fitting analysis of L-Zn (1) at different Zn(II) concentrations. Absorptions were recorded at 332 nm.

Linear Regression for Data6\_B:

$$Y = A + B * X$$

| Parameter | Value       | Error      |
|-----------|-------------|------------|
| A         | -3.93859    | 0.07987    |
| B         | -9.19632E-5 | 2.02894E-6 |

| R        | SD      | N  | P       |
|----------|---------|----|---------|
| -0.99806 | 0.16877 | 10 | <0.0001 |

$$K_s = A/B = (-3.93859/-9.19632) \times 10^5 = 4.28 \times 10^4$$

$$\Delta K_s = |\Delta A/A - \Delta B/B| \times K_s = 80$$

$$K = K_s + \Delta K_s = (4.28 \pm 0.008) \times 10^4$$

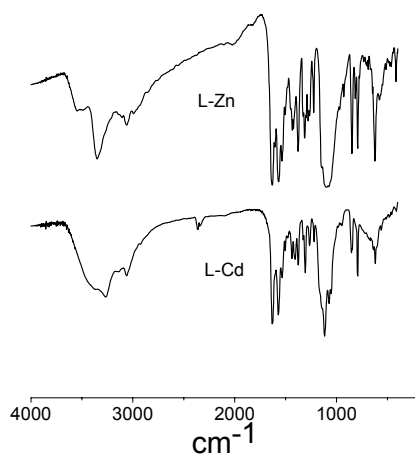

**Fig. S6** Comparison of IR spectra of L-Cd and L-Zn (**1**).  
Top: L-Zn (**1**); Bottom: L-Cd.

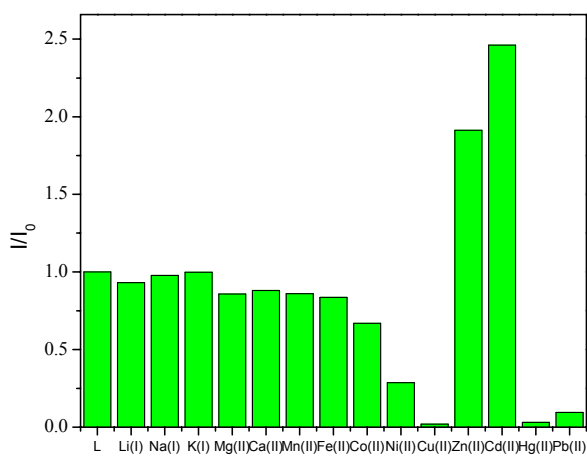

**Fig. S7** Fluorescence response of L ( $1.0 \times 10^{-5}$  M, CH<sub>3</sub>OH) to different ions ( $1.0 \times 10^{-4}$  M),  
 $\lambda_{\text{ex}} = 340$  nm.

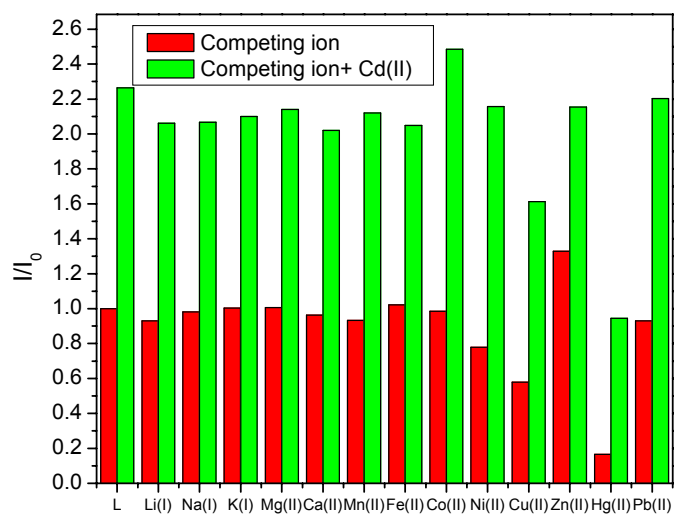

**Fig. S8** Fluorescence response of **L** ( $1.0 \times 10^{-5} \text{M}$ ,  $\text{CH}_3\text{OH}$ ) to  $\text{Cd(II)}$  in the presence of competing metal ions ( $1.0 \times 10^{-5} \text{M}$ ),  $\lambda_{\text{ex}} = 340 \text{ nm}$ .

- 
- i H. A. Benesi and J. H. Hildebrand, *J. Am. Chem. Soc.*, 1949, **71**, 2703.
  - ii C. D. Gutsche, M. Iqbal and I. Alam, *J. Am. Chem. Soc.*, 1987, **109**, 4314.
